# Supplementary material for: Accurate Quantification and Characterization of Adeno-Associated Viral Vectors
Source: PubMed Central journal article supplement (PMC6650692; doi:10.3389/fmicb.2019.01570), 2019-07-17
Supplement: Data_Sheet_1.pdf [file Data_Sheet_1.pdf]

## *Supplementary Material*

### **Accurate quantification and characterization of adeno-associated viral vectors**

David Dobnik<sup>\*</sup>, Polona Kogovšek, Tjaša Jakomin, Nejc Košir, Magda Tušek Žnidarič, Maja Leskovec, Stephen M. Kaminsky, Janet Mostrom, Hyunmi Lee, Maja Ravnikar

**\* Correspondence:**

[David Dobnik: david.dobnik@nib.si](mailto:david.dobnik@nib.si)

**Data Sheet 1.** A file with results of Tukey's multiple comparisons of means for all experimental groups with different pre-treatments and assays is available as separate file online.

Tukey multiple comparisons of means  
95% family-wise confidence level

Compared results (PCR platform\_pre-treatment\_assay)

| Group 1                  | Group 2                              | diff      | lwr       | upr      |
|--------------------------|--------------------------------------|-----------|-----------|----------|
| ddPCR_DNase_beta_actin   | ddPCR_DNase_beta_globin              | 4,37E+08  | -1,94E+09 | 2,81E+09 |
| ddPCR_DNase_beta_actin   | ddPCR_DNase_CMV_enhancer             | -1,02E+09 | -3,56E+09 | 1,53E+09 |
| ddPCR_DNase_beta_actin   | ddPCR_DNase_denat_beta_actin         | 4,80E+09  | 2,35E+09  | 7,25E+09 |
| ddPCR_DNase_beta_actin   | ddPCR_DNase_denat_beta_globin        | 5,02E+09  | 2,57E+09  | 7,47E+09 |
| ddPCR_DNase_beta_actin   | ddPCR_DNase_denat_CMV_enhancer       | 4,90E+07  | -2,40E+09 | 2,50E+09 |
| ddPCR_DNase_beta_actin   | ddPCR_DNase_denat_polyA              | 6,16E+09  | 3,71E+09  | 8,61E+09 |
| ddPCR_DNase_beta_actin   | ddPCR_DNase_denat_restr_beta_actin   | 1,23E+10  | 9,87E+09  | 1,48E+10 |
| ddPCR_DNase_beta_actin   | ddPCR_DNase_denat_restr_beta_globin  | 1,41E+10  | 1,17E+10  | 1,66E+10 |
| ddPCR_DNase_beta_actin   | ddPCR_DNase_denat_restr_CMV_enhancer | 4,12E+09  | 1,80E+09  | 6,43E+09 |
| ddPCR_DNase_beta_actin   | ddPCR_DNase_denat_restr_polyA        | 1,65E+10  | 1,41E+10  | 1,90E+10 |
| ddPCR_DNase_beta_actin   | ddPCR_DNase_polyA                    | -1,04E+09 | -3,41E+09 | 1,34E+09 |
| ddPCR_DNase_beta_actin   | qPCR_DNase_beta_actin                | 1,21E+09  | -1,16E+09 | 3,59E+09 |
| ddPCR_DNase_beta_actin   | qPCR_DNase_beta_globin               | -3,49E+08 | -2,72E+09 | 2,03E+09 |
| ddPCR_DNase_beta_actin   | qPCR_DNase_CMV_enhancer              | -3,49E+08 | -2,72E+09 | 2,03E+09 |
| ddPCR_DNase_beta_actin   | qPCR_DNase_denat_beta_actin          | 1,05E+10  | 8,51E+09  | 1,26E+10 |
| ddPCR_DNase_beta_actin   | qPCR_DNase_denat_beta_globin         | 1,04E+10  | 8,39E+09  | 1,25E+10 |
| ddPCR_DNase_beta_actin   | qPCR_DNase_denat_CMV_enhancer        | 5,14E+09  | 3,11E+09  | 7,18E+09 |
| ddPCR_DNase_beta_actin   | qPCR_DNase_denat_polyA               | 1,57E+10  | 1,36E+10  | 1,77E+10 |
| ddPCR_DNase_beta_actin   | qPCR_DNase_denat_restr_beta_actin    | 1,92E+10  | 1,70E+10  | 2,14E+10 |
| ddPCR_DNase_beta_actin   | qPCR_DNase_denat_restr_beta_globin   | 1,93E+10  | 1,71E+10  | 2,15E+10 |
| ddPCR_DNase_beta_actin   | qPCR_DNase_denat_restr_CMV_enhancer  | 9,42E+09  | 7,21E+09  | 1,16E+10 |
| ddPCR_DNase_beta_actin   | qPCR_DNase_denat_restr_polyA         | 3,36E+10  | 3,14E+10  | 3,58E+10 |
| ddPCR_DNase_beta_actin   | qPCR_DNase_polyA                     | -3,49E+08 | -2,72E+09 | 2,03E+09 |
| ddPCR_DNase_beta_globin  | ddPCR_DNase_CMV_enhancer             | -1,45E+09 | -4,06E+09 | 1,15E+09 |
| ddPCR_DNase_beta_globin  | ddPCR_DNase_denat_beta_actin         | 4,36E+09  | 1,85E+09  | 6,87E+09 |
| ddPCR_DNase_beta_globin  | ddPCR_DNase_denat_beta_globin        | 4,59E+09  | 2,08E+09  | 7,10E+09 |
| ddPCR_DNase_beta_globin  | ddPCR_DNase_denat_CMV_enhancer       | -3,88E+08 | -2,90E+09 | 2,12E+09 |
| ddPCR_DNase_beta_globin  | ddPCR_DNase_denat_polyA              | 5,73E+09  | 3,21E+09  | 8,24E+09 |
| ddPCR_DNase_beta_globin  | ddPCR_DNase_denat_restr_beta_actin   | 1,19E+10  | 9,37E+09  | 1,44E+10 |
| ddPCR_DNase_beta_globin  | ddPCR_DNase_denat_restr_beta_globin  | 1,37E+10  | 1,12E+10  | 1,62E+10 |
| ddPCR_DNase_beta_globin  | ddPCR_DNase_denat_restr_CMV_enhancer | 3,68E+09  | 1,30E+09  | 6,05E+09 |
| ddPCR_DNase_beta_globin  | ddPCR_DNase_denat_restr_polyA        | 1,61E+10  | 1,36E+10  | 1,86E+10 |
| ddPCR_DNase_beta_globin  | ddPCR_DNase_polyA                    | -1,47E+09 | -3,91E+09 | 9,63E+08 |
| ddPCR_DNase_beta_globin  | qPCR_DNase_beta_actin                | 7,77E+08  | -1,66E+09 | 3,21E+09 |
| ddPCR_DNase_beta_globin  | qPCR_DNase_beta_globin               | -7,86E+08 | -3,22E+09 | 1,65E+09 |
| ddPCR_DNase_beta_globin  | qPCR_DNase_CMV_enhancer              | -7,86E+08 | -3,22E+09 | 1,65E+09 |
| ddPCR_DNase_beta_globin  | qPCR_DNase_denat_beta_actin          | 1,01E+10  | 8,00E+09  | 1,22E+10 |
| ddPCR_DNase_beta_globin  | qPCR_DNase_denat_beta_globin         | 9,99E+09  | 7,88E+09  | 1,21E+10 |
| ddPCR_DNase_beta_globin  | qPCR_DNase_denat_CMV_enhancer        | 4,71E+09  | 2,60E+09  | 6,82E+09 |
| ddPCR_DNase_beta_globin  | qPCR_DNase_denat_polyA               | 1,52E+10  | 1,31E+10  | 1,73E+10 |
| ddPCR_DNase_beta_globin  | qPCR_DNase_denat_restr_beta_actin    | 1,88E+10  | 1,65E+10  | 2,11E+10 |
| ddPCR_DNase_beta_globin  | qPCR_DNase_denat_restr_beta_globin   | 1,89E+10  | 1,66E+10  | 2,12E+10 |
| ddPCR_DNase_beta_globin  | qPCR_DNase_denat_restr_CMV_enhancer  | 8,98E+09  | 6,71E+09  | 1,13E+10 |
| ddPCR_DNase_beta_globin  | qPCR_DNase_denat_restr_polyA         | 3,32E+10  | 3,09E+10  | 3,54E+10 |
| ddPCR_DNase_beta_globin  | qPCR_DNase_polyA                     | -7,86E+08 | -3,22E+09 | 1,65E+09 |
| ddPCR_DNase_CMV_enhancer | ddPCR_DNase_denat_beta_actin         | 5,81E+09  | 3,14E+09  | 8,49E+09 |
| ddPCR_DNase_CMV_enhancer | ddPCR_DNase_denat_beta_globin        | 6,04E+09  | 3,37E+09  | 8,71E+09 |
| ddPCR_DNase_CMV_enhancer | ddPCR_DNase_denat_CMV_enhancer       | 1,07E+09  | -1,61E+09 | 3,74E+09 |
| ddPCR_DNase_CMV_enhancer | ddPCR_DNase_denat_polyA              | 7,18E+09  | 4,50E+09  | 9,85E+09 |
| ddPCR_DNase_CMV_enhancer | ddPCR_DNase_denat_restr_beta_actin   | 1,33E+10  | 1,07E+10  | 1,60E+10 |
| ddPCR_DNase_CMV_enhancer | ddPCR_DNase_denat_restr_beta_globin  | 1,52E+10  | 1,25E+10  | 1,78E+10 |
| ddPCR_DNase_CMV_enhancer | ddPCR_DNase_denat_restr_CMV_enhancer | 5,13E+09  | 2,58E+09  | 7,68E+09 |
| ddPCR_DNase_CMV_enhancer | ddPCR_DNase_denat_restr_polyA        | 1,76E+10  | 1,49E+10  | 2,02E+10 |
| ddPCR_DNase_CMV_enhancer | ddPCR_DNase_polyA                    | -1,94E+07 | -2,62E+09 | 2,58E+09 |
| ddPCR_DNase_CMV_enhancer | qPCR_DNase_beta_actin                | 2,23E+09  | -3,74E+08 | 4,83E+09 |
| ddPCR_DNase_CMV_enhancer | qPCR_DNase_beta_globin               | 6,67E+08  | -1,94E+09 | 3,27E+09 |
| ddPCR_DNase_CMV_enhancer | qPCR_DNase_CMV_enhancer              | 6,67E+08  | -1,94E+09 | 3,27E+09 |
| ddPCR_DNase_CMV_enhancer | qPCR_DNase_denat_beta_actin          | 1,16E+10  | 9,26E+09  | 1,39E+10 |
| ddPCR_DNase_CMV_enhancer | qPCR_DNase_denat_beta_globin         | 1,14E+10  | 9,14E+09  | 1,37E+10 |

|                                |                                      |           |           |           |
|--------------------------------|--------------------------------------|-----------|-----------|-----------|
| ddPCR_DNase_CMV_enhancer       | qPCR_DNase_denat_CMV_enhancer        | 6,16E+09  | 3,86E+09  | 8,46E+09  |
| ddPCR_DNase_CMV_enhancer       | qPCR_DNase_denat_polyA               | 1,67E+10  | 1,44E+10  | 1,90E+10  |
| ddPCR_DNase_CMV_enhancer       | qPCR_DNase_denat_restr_beta_actin    | 2,02E+10  | 1,78E+10  | 2,27E+10  |
| ddPCR_DNase_CMV_enhancer       | qPCR_DNase_denat_restr_beta_globin   | 2,03E+10  | 1,79E+10  | 2,28E+10  |
| ddPCR_DNase_CMV_enhancer       | qPCR_DNase_denat_restr_CMV_enhancer  | 1,04E+10  | 7,98E+09  | 1,29E+10  |
| ddPCR_DNase_CMV_enhancer       | qPCR_DNase_denat_restr_polyA         | 3,46E+10  | 3,22E+10  | 3,71E+10  |
| ddPCR_DNase_CMV_enhancer       | qPCR_DNase_polyA                     | 6,67E+08  | -1,94E+09 | 3,27E+09  |
| ddPCR_DNase_denat_beta_actin   | ddPCR_DNase_denat_beta_globin        | 2,27E+08  | -2,36E+09 | 2,81E+09  |
| ddPCR_DNase_denat_beta_actin   | ddPCR_DNase_denat_CMV_enhancer       | -4,75E+09 | -7,33E+09 | -2,16E+09 |
| ddPCR_DNase_denat_beta_actin   | ddPCR_DNase_denat_polyA              | 1,37E+09  | -1,22E+09 | 3,95E+09  |
| ddPCR_DNase_denat_beta_actin   | ddPCR_DNase_denat_restr_beta_actin   | 7,52E+09  | 4,94E+09  | 1,01E+10  |
| ddPCR_DNase_denat_beta_actin   | ddPCR_DNase_denat_restr_beta_globin  | 9,34E+09  | 6,76E+09  | 1,19E+10  |
| ddPCR_DNase_denat_beta_actin   | ddPCR_DNase_denat_restr_CMV_enhancer | -6,82E+08 | -3,13E+09 | 1,77E+09  |
| ddPCR_DNase_denat_beta_actin   | ddPCR_DNase_denat_restr_polyA        | 1,17E+10  | 9,16E+09  | 1,43E+10  |
| ddPCR_DNase_denat_beta_actin   | ddPCR_DNase_polyA                    | -5,83E+09 | -8,34E+09 | -3,32E+09 |
| ddPCR_DNase_denat_beta_actin   | qPCR_DNase_beta_actin                | -3,58E+09 | -6,09E+09 | -1,07E+09 |
| ddPCR_DNase_denat_beta_actin   | qPCR_DNase_beta_globin               | -5,15E+09 | -7,66E+09 | -2,64E+09 |
| ddPCR_DNase_denat_beta_actin   | qPCR_DNase_CMV_enhancer              | -5,15E+09 | -7,66E+09 | -2,64E+09 |
| ddPCR_DNase_denat_beta_actin   | qPCR_DNase_denat_beta_actin          | 5,75E+09  | 3,55E+09  | 7,95E+09  |
| ddPCR_DNase_denat_beta_actin   | qPCR_DNase_denat_beta_globin         | 5,63E+09  | 3,44E+09  | 7,83E+09  |
| ddPCR_DNase_denat_beta_actin   | qPCR_DNase_denat_CMV_enhancer        | 3,47E+08  | -1,85E+09 | 2,54E+09  |
| ddPCR_DNase_denat_beta_actin   | qPCR_DNase_denat_polyA               | 1,09E+10  | 8,66E+09  | 1,31E+10  |
| ddPCR_DNase_denat_beta_actin   | qPCR_DNase_denat_restr_beta_actin    | 1,44E+10  | 1,21E+10  | 1,68E+10  |
| ddPCR_DNase_denat_beta_actin   | qPCR_DNase_denat_restr_beta_globin   | 1,45E+10  | 1,22E+10  | 1,69E+10  |
| ddPCR_DNase_denat_beta_actin   | qPCR_DNase_denat_restr_CMV_enhancer  | 4,62E+09  | 2,27E+09  | 6,98E+09  |
| ddPCR_DNase_denat_beta_actin   | qPCR_DNase_denat_restr_polyA         | 2,88E+10  | 2,64E+10  | 3,12E+10  |
| ddPCR_DNase_denat_beta_actin   | qPCR_DNase_polyA                     | -5,15E+09 | -7,66E+09 | -2,64E+09 |
| ddPCR_DNase_denat_beta_globin  | ddPCR_DNase_denat_CMV_enhancer       | -4,97E+09 | -7,56E+09 | -2,39E+09 |
| ddPCR_DNase_denat_beta_globin  | ddPCR_DNase_denat_polyA              | 1,14E+09  | -1,44E+09 | 3,72E+09  |
| ddPCR_DNase_denat_beta_globin  | ddPCR_DNase_denat_restr_beta_actin   | 7,29E+09  | 4,71E+09  | 9,88E+09  |
| ddPCR_DNase_denat_beta_globin  | ddPCR_DNase_denat_restr_beta_globin  | 9,12E+09  | 6,53E+09  | 1,17E+10  |
| ddPCR_DNase_denat_beta_globin  | ddPCR_DNase_denat_restr_CMV_enhancer | -9,09E+08 | -3,36E+09 | 1,54E+09  |
| ddPCR_DNase_denat_beta_globin  | ddPCR_DNase_denat_restr_polyA        | 1,15E+10  | 8,93E+09  | 1,41E+10  |
| ddPCR_DNase_denat_beta_globin  | ddPCR_DNase_polyA                    | -6,06E+09 | -8,57E+09 | -3,55E+09 |
| ddPCR_DNase_denat_beta_globin  | qPCR_DNase_beta_actin                | -3,81E+09 | -6,32E+09 | -1,30E+09 |
| ddPCR_DNase_denat_beta_globin  | qPCR_DNase_beta_globin               | -5,37E+09 | -7,88E+09 | -2,86E+09 |
| ddPCR_DNase_denat_beta_globin  | qPCR_DNase_CMV_enhancer              | -5,37E+09 | -7,88E+09 | -2,86E+09 |
| ddPCR_DNase_denat_beta_globin  | qPCR_DNase_denat_beta_actin          | 5,52E+09  | 3,33E+09  | 7,72E+09  |
| ddPCR_DNase_denat_beta_globin  | qPCR_DNase_denat_beta_globin         | 5,40E+09  | 3,21E+09  | 7,60E+09  |
| ddPCR_DNase_denat_beta_globin  | qPCR_DNase_denat_CMV_enhancer        | 1,20E+08  | -2,08E+09 | 2,32E+09  |
| ddPCR_DNase_denat_beta_globin  | qPCR_DNase_denat_polyA               | 1,06E+10  | 8,44E+09  | 1,28E+10  |
| ddPCR_DNase_denat_beta_globin  | qPCR_DNase_denat_restr_beta_actin    | 1,42E+10  | 1,18E+10  | 1,66E+10  |
| ddPCR_DNase_denat_beta_globin  | qPCR_DNase_denat_restr_beta_globin   | 1,43E+10  | 1,19E+10  | 1,66E+10  |
| ddPCR_DNase_denat_beta_globin  | qPCR_DNase_denat_restr_CMV_enhancer  | 4,40E+09  | 2,04E+09  | 6,76E+09  |
| ddPCR_DNase_denat_beta_globin  | qPCR_DNase_denat_restr_polyA         | 2,86E+10  | 2,62E+10  | 3,09E+10  |
| ddPCR_DNase_denat_beta_globin  | qPCR_DNase_polyA                     | -5,37E+09 | -7,88E+09 | -2,86E+09 |
| ddPCR_DNase_denat_CMV_enhancer | ddPCR_DNase_denat_polyA              | 6,11E+09  | 3,53E+09  | 8,70E+09  |
| ddPCR_DNase_denat_CMV_enhancer | ddPCR_DNase_denat_restr_beta_actin   | 1,23E+10  | 9,68E+09  | 1,49E+10  |
| ddPCR_DNase_denat_CMV_enhancer | ddPCR_DNase_denat_restr_beta_globin  | 1,41E+10  | 1,15E+10  | 1,67E+10  |
| ddPCR_DNase_denat_CMV_enhancer | ddPCR_DNase_denat_restr_CMV_enhancer | 4,07E+09  | 1,62E+09  | 6,52E+09  |
| ddPCR_DNase_denat_CMV_enhancer | ddPCR_DNase_denat_restr_polyA        | 1,65E+10  | 1,39E+10  | 1,91E+10  |
| ddPCR_DNase_denat_CMV_enhancer | ddPCR_DNase_polyA                    | -1,08E+09 | -3,60E+09 | 1,43E+09  |
| ddPCR_DNase_denat_CMV_enhancer | qPCR_DNase_beta_actin                | 1,16E+09  | -1,35E+09 | 3,68E+09  |
| ddPCR_DNase_denat_CMV_enhancer | qPCR_DNase_beta_globin               | -3,98E+08 | -2,91E+09 | 2,11E+09  |
| ddPCR_DNase_denat_CMV_enhancer | qPCR_DNase_CMV_enhancer              | -3,98E+08 | -2,91E+09 | 2,11E+09  |
| ddPCR_DNase_denat_CMV_enhancer | qPCR_DNase_denat_beta_actin          | 1,05E+10  | 8,30E+09  | 1,27E+10  |
| ddPCR_DNase_denat_CMV_enhancer | qPCR_DNase_denat_beta_globin         | 1,04E+10  | 8,18E+09  | 1,26E+10  |
| ddPCR_DNase_denat_CMV_enhancer | qPCR_DNase_denat_CMV_enhancer        | 5,09E+09  | 2,90E+09  | 7,29E+09  |
| ddPCR_DNase_denat_CMV_enhancer | qPCR_DNase_denat_polyA               | 1,56E+10  | 1,34E+10  | 1,78E+10  |
| ddPCR_DNase_denat_CMV_enhancer | qPCR_DNase_denat_restr_beta_actin    | 1,92E+10  | 1,68E+10  | 2,15E+10  |
| ddPCR_DNase_denat_CMV_enhancer | qPCR_DNase_denat_restr_beta_globin   | 1,93E+10  | 1,69E+10  | 2,16E+10  |
| ddPCR_DNase_denat_CMV_enhancer | qPCR_DNase_denat_restr_CMV_enhancer  | 9,37E+09  | 7,01E+09  | 1,17E+10  |
| ddPCR_DNase_denat_CMV_enhancer | qPCR_DNase_denat_restr_polyA         | 3,36E+10  | 3,12E+10  | 3,59E+10  |
| ddPCR_DNase_denat_CMV_enhancer | qPCR_DNase_polyA                     | -3,98E+08 | -2,91E+09 | 2,11E+09  |
| ddPCR_DNase_denat_polyA        | ddPCR_DNase_denat_restr_beta_actin   | 6,15E+09  | 3,57E+09  | 8,74E+09  |

|                                      |                                      |           |           |           |
|--------------------------------------|--------------------------------------|-----------|-----------|-----------|
| ddPCR_DNase_denat_polyA              | ddPCR_DNase_denat_restr_beta_globin  | 7,98E+09  | 5,39E+09  | 1,06E+10  |
| ddPCR_DNase_denat_polyA              | ddPCR_DNase_denat_restr_CMV_enhancer | -2,05E+09 | -4,50E+09 | 4,04E+08  |
| ddPCR_DNase_denat_polyA              | ddPCR_DNase_denat_restr_polyA        | 1,04E+10  | 7,79E+09  | 1,30E+10  |
| ddPCR_DNase_denat_polyA              | ddPCR_DNase_polyA                    | -7,20E+09 | -9,71E+09 | -4,69E+09 |
| ddPCR_DNase_denat_polyA              | qPCR_DNase_beta_actin                | -4,95E+09 | -7,46E+09 | -2,44E+09 |
| ddPCR_DNase_denat_polyA              | qPCR_DNase_beta_globin               | -6,51E+09 | -9,02E+09 | -4,00E+09 |
| ddPCR_DNase_denat_polyA              | qPCR_DNase_CMV_enhancer              | -6,51E+09 | -9,02E+09 | -4,00E+09 |
| ddPCR_DNase_denat_polyA              | qPCR_DNase_denat_beta_actin          | 4,38E+09  | 2,19E+09  | 6,58E+09  |
| ddPCR_DNase_denat_polyA              | qPCR_DNase_denat_beta_globin         | 4,27E+09  | 2,07E+09  | 6,46E+09  |
| ddPCR_DNase_denat_polyA              | qPCR_DNase_denat_CMV_enhancer        | -1,02E+09 | -3,21E+09 | 1,18E+09  |
| ddPCR_DNase_denat_polyA              | qPCR_DNase_denat_polyA               | 9,49E+09  | 7,30E+09  | 1,17E+10  |
| ddPCR_DNase_denat_polyA              | qPCR_DNase_denat_restr_beta_actin    | 1,31E+10  | 1,07E+10  | 1,54E+10  |
| ddPCR_DNase_denat_polyA              | qPCR_DNase_denat_restr_beta_globin   | 1,31E+10  | 1,08E+10  | 1,55E+10  |
| ddPCR_DNase_denat_polyA              | qPCR_DNase_denat_restr_CMV_enhancer  | 3,26E+09  | 9,00E+08  | 5,62E+09  |
| ddPCR_DNase_denat_polyA              | qPCR_DNase_denat_restr_polyA         | 2,74E+10  | 2,51E+10  | 2,98E+10  |
| ddPCR_DNase_denat_polyA              | qPCR_DNase_polyA                     | -6,51E+09 | -9,02E+09 | -4,00E+09 |
| ddPCR_DNase_denat_restr_beta_actin   | ddPCR_DNase_denat_restr_beta_globin  | 1,82E+09  | -7,60E+08 | 4,41E+09  |
| ddPCR_DNase_denat_restr_beta_actin   | ddPCR_DNase_denat_restr_CMV_enhancer | -8,20E+09 | -1,07E+10 | -5,75E+09 |
| ddPCR_DNase_denat_restr_beta_actin   | ddPCR_DNase_denat_restr_polyA        | 4,22E+09  | 1,64E+09  | 6,80E+09  |
| ddPCR_DNase_denat_restr_beta_actin   | ddPCR_DNase_polyA                    | -1,34E+10 | -1,59E+10 | -1,08E+10 |
| ddPCR_DNase_denat_restr_beta_actin   | qPCR_DNase_beta_actin                | -1,11E+10 | -1,36E+10 | -8,59E+09 |
| ddPCR_DNase_denat_restr_beta_actin   | qPCR_DNase_beta_globin               | -1,27E+10 | -1,52E+10 | -1,02E+10 |
| ddPCR_DNase_denat_restr_beta_actin   | qPCR_DNase_CMV_enhancer              | -1,27E+10 | -1,52E+10 | -1,02E+10 |
| ddPCR_DNase_denat_restr_beta_actin   | qPCR_DNase_denat_beta_actin          | -1,77E+09 | -3,96E+09 | 4,26E+08  |
| ddPCR_DNase_denat_restr_beta_actin   | qPCR_DNase_denat_beta_globin         | -1,89E+09 | -4,08E+09 | 3,07E+08  |
| ddPCR_DNase_denat_restr_beta_actin   | qPCR_DNase_denat_CMV_enhancer        | -7,17E+09 | -9,37E+09 | -4,98E+09 |
| ddPCR_DNase_denat_restr_beta_actin   | qPCR_DNase_denat_polyA               | 3,34E+09  | 1,15E+09  | 5,54E+09  |
| ddPCR_DNase_denat_restr_beta_actin   | qPCR_DNase_denat_restr_beta_actin    | 6,90E+09  | 4,54E+09  | 9,26E+09  |
| ddPCR_DNase_denat_restr_beta_actin   | qPCR_DNase_denat_restr_beta_globin   | 7,00E+09  | 4,64E+09  | 9,35E+09  |
| ddPCR_DNase_denat_restr_beta_actin   | qPCR_DNase_denat_restr_CMV_enhancer  | -2,89E+09 | -5,25E+09 | -5,36E+08 |
| ddPCR_DNase_denat_restr_beta_actin   | qPCR_DNase_denat_restr_polyA         | 2,13E+10  | 1,89E+10  | 2,36E+10  |
| ddPCR_DNase_denat_restr_beta_actin   | qPCR_DNase_polyA                     | -1,27E+10 | -1,52E+10 | -1,02E+10 |
| ddPCR_DNase_denat_restr_beta_globin  | ddPCR_DNase_denat_restr_CMV_enhancer | -1,00E+10 | -1,25E+10 | -7,57E+09 |
| ddPCR_DNase_denat_restr_beta_globin  | ddPCR_DNase_denat_restr_polyA        | 2,40E+09  | -1,87E+08 | 4,98E+09  |
| ddPCR_DNase_denat_restr_beta_globin  | ddPCR_DNase_polyA                    | -1,52E+10 | -1,77E+10 | -1,27E+10 |
| ddPCR_DNase_denat_restr_beta_globin  | qPCR_DNase_beta_actin                | -1,29E+10 | -1,54E+10 | -1,04E+10 |
| ddPCR_DNase_denat_restr_beta_globin  | qPCR_DNase_beta_globin               | -1,45E+10 | -1,70E+10 | -1,20E+10 |
| ddPCR_DNase_denat_restr_beta_globin  | qPCR_DNase_CMV_enhancer              | -1,45E+10 | -1,70E+10 | -1,20E+10 |
| ddPCR_DNase_denat_restr_beta_globin  | qPCR_DNase_denat_beta_actin          | -3,59E+09 | -5,79E+09 | -1,40E+09 |
| ddPCR_DNase_denat_restr_beta_globin  | qPCR_DNase_denat_beta_globin         | -3,71E+09 | -5,91E+09 | -1,52E+09 |
| ddPCR_DNase_denat_restr_beta_globin  | qPCR_DNase_denat_CMV_enhancer        | -9,00E+09 | -1,12E+10 | -6,80E+09 |
| ddPCR_DNase_denat_restr_beta_globin  | qPCR_DNase_denat_polyA               | 1,52E+09  | -6,78E+08 | 3,71E+09  |
| ddPCR_DNase_denat_restr_beta_globin  | qPCR_DNase_denat_restr_beta_actin    | 5,08E+09  | 2,72E+09  | 7,44E+09  |
| ddPCR_DNase_denat_restr_beta_globin  | qPCR_DNase_denat_restr_beta_globin   | 5,17E+09  | 2,81E+09  | 7,53E+09  |
| ddPCR_DNase_denat_restr_beta_globin  | qPCR_DNase_denat_restr_CMV_enhancer  | -4,72E+09 | -7,08E+09 | -2,36E+09 |
| ddPCR_DNase_denat_restr_beta_globin  | qPCR_DNase_denat_restr_polyA         | 1,95E+10  | 1,71E+10  | 2,18E+10  |
| ddPCR_DNase_denat_restr_beta_globin  | qPCR_DNase_polyA                     | -1,45E+10 | -1,70E+10 | -1,20E+10 |
| ddPCR_DNase_denat_restr_CMV_enhancer | ddPCR_DNase_denat_restr_polyA        | 1,24E+10  | 9,97E+09  | 1,49E+10  |
| ddPCR_DNase_denat_restr_CMV_enhancer | ddPCR_DNase_polyA                    | -5,15E+09 | -7,52E+09 | -2,78E+09 |
| ddPCR_DNase_denat_restr_CMV_enhancer | qPCR_DNase_beta_actin                | -2,90E+09 | -5,28E+09 | -5,27E+08 |
| ddPCR_DNase_denat_restr_CMV_enhancer | qPCR_DNase_beta_globin               | -4,46E+09 | -6,84E+09 | -2,09E+09 |
| ddPCR_DNase_denat_restr_CMV_enhancer | qPCR_DNase_CMV_enhancer              | -4,46E+09 | -6,84E+09 | -2,09E+09 |
| ddPCR_DNase_denat_restr_CMV_enhancer | qPCR_DNase_denat_beta_actin          | 6,43E+09  | 4,39E+09  | 8,47E+09  |
| ddPCR_DNase_denat_restr_CMV_enhancer | qPCR_DNase_denat_beta_globin         | 6,31E+09  | 4,27E+09  | 8,35E+09  |
| ddPCR_DNase_denat_restr_CMV_enhancer | qPCR_DNase_denat_CMV_enhancer        | 1,03E+09  | -1,01E+09 | 3,07E+09  |
| ddPCR_DNase_denat_restr_CMV_enhancer | qPCR_DNase_denat_polyA               | 1,15E+10  | 9,50E+09  | 1,36E+10  |
| ddPCR_DNase_denat_restr_CMV_enhancer | qPCR_DNase_denat_restr_beta_actin    | 1,51E+10  | 1,29E+10  | 1,73E+10  |
| ddPCR_DNase_denat_restr_CMV_enhancer | qPCR_DNase_denat_restr_beta_globin   | 1,52E+10  | 1,30E+10  | 1,74E+10  |
| ddPCR_DNase_denat_restr_CMV_enhancer | qPCR_DNase_denat_restr_CMV_enhancer  | 5,31E+09  | 3,09E+09  | 7,52E+09  |
| ddPCR_DNase_denat_restr_CMV_enhancer | qPCR_DNase_denat_restr_polyA         | 2,95E+10  | 2,73E+10  | 3,17E+10  |
| ddPCR_DNase_denat_restr_CMV_enhancer | qPCR_DNase_polyA                     | -4,46E+09 | -6,84E+09 | -2,09E+09 |
| ddPCR_DNase_denat_restr_polyA        | ddPCR_DNase_polyA                    | -1,76E+10 | -2,01E+10 | -1,51E+10 |
| ddPCR_DNase_denat_restr_polyA        | qPCR_DNase_beta_actin                | -1,53E+10 | -1,78E+10 | -1,28E+10 |
| ddPCR_DNase_denat_restr_polyA        | qPCR_DNase_beta_globin               | -1,69E+10 | -1,94E+10 | -1,44E+10 |
| ddPCR_DNase_denat_restr_polyA        | qPCR_DNase_CMV_enhancer              | -1,69E+10 | -1,94E+10 | -1,44E+10 |

|                               |                                     |           |           |           |
|-------------------------------|-------------------------------------|-----------|-----------|-----------|
| ddPCR_DNase_denat_restr_polyA | qPCR_DNase_denat_beta_actin         | -5,99E+09 | -8,19E+09 | -3,79E+09 |
| ddPCR_DNase_denat_restr_polyA | qPCR_DNase_denat_beta_globin        | -6,11E+09 | -8,30E+09 | -3,91E+09 |
| ddPCR_DNase_denat_restr_polyA | qPCR_DNase_denat_CMV_enhancer       | -1,14E+10 | -1,36E+10 | -9,20E+09 |
| ddPCR_DNase_denat_restr_polyA | qPCR_DNase_denat_polyA              | -8,79E+08 | -3,07E+09 | 1,32E+09  |
| ddPCR_DNase_denat_restr_polyA | qPCR_DNase_denat_restr_beta_actin   | 2,68E+09  | 3,21E+08  | 5,04E+09  |
| ddPCR_DNase_denat_restr_polyA | qPCR_DNase_denat_restr_beta_globin  | 2,78E+09  | 4,17E+08  | 5,13E+09  |
| ddPCR_DNase_denat_restr_polyA | qPCR_DNase_denat_restr_CMV_enhancer | -7,12E+09 | -9,47E+09 | -4,76E+09 |
| ddPCR_DNase_denat_restr_polyA | qPCR_DNase_denat_restr_polyA        | 1,71E+10  | 1,47E+10  | 1,94E+10  |
| ddPCR_DNase_denat_restr_polyA | qPCR_DNase_polyA                    | -1,69E+10 | -1,94E+10 | -1,44E+10 |
| ddPCR_DNase_polyA             | qPCR_DNase_beta_actin               | 2,25E+09  | -1,87E+08 | 4,69E+09  |
| ddPCR_DNase_polyA             | qPCR_DNase_beta_globin              | 6,86E+08  | -1,75E+09 | 3,12E+09  |
| ddPCR_DNase_polyA             | qPCR_DNase_CMV_enhancer             | 6,86E+08  | -1,75E+09 | 3,12E+09  |
| ddPCR_DNase_polyA             | qPCR_DNase_denat_beta_actin         | 1,16E+10  | 9,47E+09  | 1,37E+10  |
| ddPCR_DNase_polyA             | qPCR_DNase_denat_beta_globin        | 1,15E+10  | 9,35E+09  | 1,36E+10  |
| ddPCR_DNase_polyA             | qPCR_DNase_denat_CMV_enhancer       | 6,18E+09  | 4,07E+09  | 8,29E+09  |
| ddPCR_DNase_polyA             | qPCR_DNase_denat_polyA              | 1,67E+10  | 1,46E+10  | 1,88E+10  |
| ddPCR_DNase_polyA             | qPCR_DNase_denat_restr_beta_actin   | 2,03E+10  | 1,80E+10  | 2,25E+10  |
| ddPCR_DNase_polyA             | qPCR_DNase_denat_restr_beta_globin  | 2,03E+10  | 1,81E+10  | 2,26E+10  |
| ddPCR_DNase_polyA             | qPCR_DNase_denat_restr_CMV_enhancer | 1,05E+10  | 8,18E+09  | 1,27E+10  |
| ddPCR_DNase_polyA             | qPCR_DNase_denat_restr_polyA        | 3,46E+10  | 3,24E+10  | 3,69E+10  |
| ddPCR_DNase_polyA             | qPCR_DNase_polyA                    | 6,86E+08  | -1,75E+09 | 3,12E+09  |
| qPCR_DNase_beta_actin         | qPCR_DNase_beta_globin              | -1,56E+09 | -4,00E+09 | 8,73E+08  |
| qPCR_DNase_beta_actin         | qPCR_DNase_CMV_enhancer             | -1,56E+09 | -4,00E+09 | 8,73E+08  |
| qPCR_DNase_beta_actin         | qPCR_DNase_denat_beta_actin         | 9,33E+09  | 7,22E+09  | 1,14E+10  |
| qPCR_DNase_beta_actin         | qPCR_DNase_denat_beta_globin        | 9,21E+09  | 7,10E+09  | 1,13E+10  |
| qPCR_DNase_beta_actin         | qPCR_DNase_denat_CMV_enhancer       | 3,93E+09  | 1,82E+09  | 6,04E+09  |
| qPCR_DNase_beta_actin         | qPCR_DNase_denat_polyA              | 1,44E+10  | 1,23E+10  | 1,66E+10  |
| qPCR_DNase_beta_actin         | qPCR_DNase_denat_restr_beta_actin   | 1,80E+10  | 1,57E+10  | 2,03E+10  |
| qPCR_DNase_beta_actin         | qPCR_DNase_denat_restr_beta_globin  | 1,81E+10  | 1,58E+10  | 2,04E+10  |
| qPCR_DNase_beta_actin         | qPCR_DNase_denat_restr_CMV_enhancer | 8,21E+09  | 5,93E+09  | 1,05E+10  |
| qPCR_DNase_beta_actin         | qPCR_DNase_denat_restr_polyA        | 3,24E+10  | 3,01E+10  | 3,47E+10  |
| qPCR_DNase_beta_actin         | qPCR_DNase_polyA                    | -1,56E+09 | -4,00E+09 | 8,73E+08  |
| qPCR_DNase_beta_globin        | qPCR_DNase_CMV_enhancer             | 9,11E-05  | -2,44E+09 | 2,44E+09  |
| qPCR_DNase_beta_globin        | qPCR_DNase_denat_beta_actin         | 1,09E+10  | 8,79E+09  | 1,30E+10  |
| qPCR_DNase_beta_globin        | qPCR_DNase_denat_beta_globin        | 1,08E+10  | 8,67E+09  | 1,29E+10  |
| qPCR_DNase_beta_globin        | qPCR_DNase_denat_CMV_enhancer       | 5,49E+09  | 3,38E+09  | 7,60E+09  |
| qPCR_DNase_beta_globin        | qPCR_DNase_denat_polyA              | 1,60E+10  | 1,39E+10  | 1,81E+10  |
| qPCR_DNase_beta_globin        | qPCR_DNase_denat_restr_beta_actin   | 1,96E+10  | 1,73E+10  | 2,18E+10  |
| qPCR_DNase_beta_globin        | qPCR_DNase_denat_restr_beta_globin  | 1,97E+10  | 1,74E+10  | 2,19E+10  |
| qPCR_DNase_beta_globin        | qPCR_DNase_denat_restr_CMV_enhancer | 9,77E+09  | 7,49E+09  | 1,20E+10  |
| qPCR_DNase_beta_globin        | qPCR_DNase_denat_restr_polyA        | 3,40E+10  | 3,17E+10  | 3,62E+10  |
| qPCR_DNase_beta_globin        | qPCR_DNase_polyA                    | 3,43E-05  | -2,44E+09 | 2,44E+09  |
| qPCR_DNase_CMV_enhancer       | qPCR_DNase_denat_beta_actin         | 1,09E+10  | 8,79E+09  | 1,30E+10  |
| qPCR_DNase_CMV_enhancer       | qPCR_DNase_denat_beta_globin        | 1,08E+10  | 8,67E+09  | 1,29E+10  |
| qPCR_DNase_CMV_enhancer       | qPCR_DNase_denat_CMV_enhancer       | 5,49E+09  | 3,38E+09  | 7,60E+09  |
| qPCR_DNase_CMV_enhancer       | qPCR_DNase_denat_polyA              | 1,60E+10  | 1,39E+10  | 1,81E+10  |
| qPCR_DNase_CMV_enhancer       | qPCR_DNase_denat_restr_beta_actin   | 1,96E+10  | 1,73E+10  | 2,18E+10  |
| qPCR_DNase_CMV_enhancer       | qPCR_DNase_denat_restr_beta_globin  | 1,97E+10  | 1,74E+10  | 2,19E+10  |
| qPCR_DNase_CMV_enhancer       | qPCR_DNase_denat_restr_CMV_enhancer | 9,77E+09  | 7,49E+09  | 1,20E+10  |
| qPCR_DNase_CMV_enhancer       | qPCR_DNase_denat_restr_polyA        | 3,40E+10  | 3,17E+10  | 3,62E+10  |
| qPCR_DNase_CMV_enhancer       | qPCR_DNase_polyA                    | -5,67E-05 | -2,44E+09 | 2,44E+09  |
| qPCR_DNase_denat_beta_actin   | qPCR_DNase_denat_beta_globin        | -1,19E+08 | -1,84E+09 | 1,60E+09  |
| qPCR_DNase_denat_beta_actin   | qPCR_DNase_denat_CMV_enhancer       | -5,40E+09 | -7,13E+09 | -3,68E+09 |
| qPCR_DNase_denat_beta_actin   | qPCR_DNase_denat_polyA              | 5,11E+09  | 3,39E+09  | 6,83E+09  |
| qPCR_DNase_denat_beta_actin   | qPCR_DNase_denat_restr_beta_actin   | 8,67E+09  | 6,74E+09  | 1,06E+10  |
| qPCR_DNase_denat_beta_actin   | qPCR_DNase_denat_restr_beta_globin  | 8,76E+09  | 6,84E+09  | 1,07E+10  |
| qPCR_DNase_denat_beta_actin   | qPCR_DNase_denat_restr_CMV_enhancer | -1,13E+09 | -3,05E+09 | 8,00E+08  |
| qPCR_DNase_denat_beta_actin   | qPCR_DNase_denat_restr_polyA        | 2,31E+10  | 2,11E+10  | 2,50E+10  |
| qPCR_DNase_denat_beta_actin   | qPCR_DNase_polyA                    | -1,09E+10 | -1,30E+10 | -8,79E+09 |
| qPCR_DNase_denat_beta_globin  | qPCR_DNase_denat_CMV_enhancer       | -5,28E+09 | -7,01E+09 | -3,56E+09 |
| qPCR_DNase_denat_beta_globin  | qPCR_DNase_denat_polyA              | 5,23E+09  | 3,51E+09  | 6,95E+09  |
| qPCR_DNase_denat_beta_globin  | qPCR_DNase_denat_restr_beta_actin   | 8,79E+09  | 6,86E+09  | 1,07E+10  |
| qPCR_DNase_denat_beta_globin  | qPCR_DNase_denat_restr_beta_globin  | 8,88E+09  | 6,96E+09  | 1,08E+10  |
| qPCR_DNase_denat_beta_globin  | qPCR_DNase_denat_restr_CMV_enhancer | -1,01E+09 | -2,93E+09 | 9,19E+08  |
| qPCR_DNase_denat_beta_globin  | qPCR_DNase_denat_restr_polyA        | 2,32E+10  | 2,12E+10  | 2,51E+10  |

|                                     |                                     |           |           |           |
|-------------------------------------|-------------------------------------|-----------|-----------|-----------|
| qPCR_DNase_denat_beta_globin        | qPCR_DNase_polyA                    | -1,08E+10 | -1,29E+10 | -8,67E+09 |
| qPCR_DNase_denat_CMV_enhancer       | qPCR_DNase_denat_polyA              | 1,05E+10  | 8,79E+09  | 1,22E+10  |
| qPCR_DNase_denat_CMV_enhancer       | qPCR_DNase_denat_restr_beta_actin   | 1,41E+10  | 1,21E+10  | 1,60E+10  |
| qPCR_DNase_denat_CMV_enhancer       | qPCR_DNase_denat_restr_beta_globin  | 1,42E+10  | 1,22E+10  | 1,61E+10  |
| qPCR_DNase_denat_CMV_enhancer       | qPCR_DNase_denat_restr_CMV_enhancer | 4,28E+09  | 2,35E+09  | 6,20E+09  |
| qPCR_DNase_denat_CMV_enhancer       | qPCR_DNase_denat_restr_polyA        | 2,85E+10  | 2,65E+10  | 3,04E+10  |
| qPCR_DNase_denat_CMV_enhancer       | qPCR_DNase_polyA                    | -5,49E+09 | -7,60E+09 | -3,38E+09 |
| qPCR_DNase_denat_polyA              | qPCR_DNase_denat_restr_beta_actin   | 3,56E+09  | 1,63E+09  | 5,48E+09  |
| qPCR_DNase_denat_polyA              | qPCR_DNase_denat_restr_beta_globin  | 3,65E+09  | 1,73E+09  | 5,58E+09  |
| qPCR_DNase_denat_polyA              | qPCR_DNase_denat_restr_CMV_enhancer | -6,24E+09 | -8,16E+09 | -4,31E+09 |
| qPCR_DNase_denat_polyA              | qPCR_DNase_denat_restr_polyA        | 1,79E+10  | 1,60E+10  | 1,99E+10  |
| qPCR_DNase_denat_polyA              | qPCR_DNase_polyA                    | -1,60E+10 | -1,81E+10 | -1,39E+10 |
| qPCR_DNase_denat_restr_beta_actin   | qPCR_DNase_denat_restr_beta_globin  | 9,53E+07  | -2,01E+09 | 2,20E+09  |
| qPCR_DNase_denat_restr_beta_actin   | qPCR_DNase_denat_restr_CMV_enhancer | -9,80E+09 | -1,19E+10 | -7,69E+09 |
| qPCR_DNase_denat_restr_beta_actin   | qPCR_DNase_denat_restr_polyA        | 1,44E+10  | 1,23E+10  | 1,65E+10  |
| qPCR_DNase_denat_restr_beta_actin   | qPCR_DNase_polyA                    | -1,96E+10 | -2,18E+10 | -1,73E+10 |
| qPCR_DNase_denat_restr_beta_globin  | qPCR_DNase_denat_restr_CMV_enhancer | -9,89E+09 | -1,20E+10 | -7,78E+09 |
| qPCR_DNase_denat_restr_beta_globin  | qPCR_DNase_denat_restr_polyA        | 1,43E+10  | 1,22E+10  | 1,64E+10  |
| qPCR_DNase_denat_restr_beta_globin  | qPCR_DNase_polyA                    | -1,97E+10 | -2,19E+10 | -1,74E+10 |
| qPCR_DNase_denat_restr_CMV_enhancer | qPCR_DNase_denat_restr_polyA        | 2,42E+10  | 2,21E+10  | 2,63E+10  |
| qPCR_DNase_denat_restr_CMV_enhancer | qPCR_DNase_polyA                    | -9,77E+09 | -1,20E+10 | -7,49E+09 |
| qPCR_DNase_denat_restr_polyA        | qPCR_DNase_polyA                    | -3,40E+10 | -3,62E+10 | -3,17E+10 |

adjusted p value

|                         |                                      |         |
|-------------------------|--------------------------------------|---------|
| ddPCR_DNase_beta_actin  | ddPCR_DNase_beta_globin              | 1,00000 |
| ddPCR_DNase_beta_actin  | ddPCR_DNase_CMV_enhancer             | 0,99879 |
| ddPCR_DNase_beta_actin  | ddPCR_DNase_denat_beta_actin         | 0,00000 |
| ddPCR_DNase_beta_actin  | ddPCR_DNase_denat_beta_globin        | 0,00000 |
| ddPCR_DNase_beta_actin  | ddPCR_DNase_denat_CMV_enhancer       | 1,00000 |
| ddPCR_DNase_beta_actin  | ddPCR_DNase_denat_polyA              | 0,00000 |
| ddPCR_DNase_beta_actin  | ddPCR_DNase_denat_restr_beta_actin   | 0,00000 |
| ddPCR_DNase_beta_actin  | ddPCR_DNase_denat_restr_beta_globin  | 0,00000 |
| ddPCR_DNase_beta_actin  | ddPCR_DNase_denat_restr_CMV_enhancer | 0,00000 |
| ddPCR_DNase_beta_actin  | ddPCR_DNase_denat_restr_polyA        | 0,00000 |
| ddPCR_DNase_beta_actin  | ddPCR_DNase_polyA                    | 0,99573 |
| ddPCR_DNase_beta_actin  | qPCR_DNase_beta_actin                | 0,96992 |
| ddPCR_DNase_beta_actin  | qPCR_DNase_beta_globin               | 1,00000 |
| ddPCR_DNase_beta_actin  | qPCR_DNase_CMV_enhancer              | 1,00000 |
| ddPCR_DNase_beta_actin  | qPCR_DNase_denat_beta_actin          | 0,00000 |
| ddPCR_DNase_beta_actin  | qPCR_DNase_denat_beta_globin         | 0,00000 |
| ddPCR_DNase_beta_actin  | qPCR_DNase_denat_CMV_enhancer        | 0,00000 |
| ddPCR_DNase_beta_actin  | qPCR_DNase_denat_polyA               | 0,00000 |
| ddPCR_DNase_beta_actin  | qPCR_DNase_denat_restr_beta_actin    | 0,00000 |
| ddPCR_DNase_beta_actin  | qPCR_DNase_denat_restr_beta_globin   | 0,00000 |
| ddPCR_DNase_beta_actin  | qPCR_DNase_denat_restr_CMV_enhancer  | 0,00000 |
| ddPCR_DNase_beta_actin  | qPCR_DNase_denat_restr_polyA         | 0,00000 |
| ddPCR_DNase_beta_actin  | qPCR_DNase_polyA                     | 1,00000 |
| ddPCR_DNase_beta_globin | ddPCR_DNase_CMV_enhancer             | 0,92667 |
| ddPCR_DNase_beta_globin | ddPCR_DNase_denat_beta_actin         | 0,00000 |
| ddPCR_DNase_beta_globin | ddPCR_DNase_denat_beta_globin        | 0,00000 |
| ddPCR_DNase_beta_globin | ddPCR_DNase_denat_CMV_enhancer       | 1,00000 |
| ddPCR_DNase_beta_globin | ddPCR_DNase_denat_polyA              | 0,00000 |
| ddPCR_DNase_beta_globin | ddPCR_DNase_denat_restr_beta_actin   | 0,00000 |
| ddPCR_DNase_beta_globin | ddPCR_DNase_denat_restr_beta_globin  | 0,00000 |
| ddPCR_DNase_beta_globin | ddPCR_DNase_denat_restr_CMV_enhancer | 0,00001 |
| ddPCR_DNase_beta_globin | ddPCR_DNase_denat_restr_polyA        | 0,00000 |
| ddPCR_DNase_beta_globin | ddPCR_DNase_polyA                    | 0,85324 |
| ddPCR_DNase_beta_globin | qPCR_DNase_beta_actin                | 0,99997 |
| ddPCR_DNase_beta_globin | qPCR_DNase_beta_globin               | 0,99996 |
| ddPCR_DNase_beta_globin | qPCR_DNase_CMV_enhancer              | 0,99996 |
| ddPCR_DNase_beta_globin | qPCR_DNase_denat_beta_actin          | 0,00000 |
| ddPCR_DNase_beta_globin | qPCR_DNase_denat_beta_globin         | 0,00000 |
| ddPCR_DNase_beta_globin | qPCR_DNase_denat_CMV_enhancer        | 0,00000 |
| ddPCR_DNase_beta_globin | qPCR_DNase_denat_polyA               | 0,00000 |
| ddPCR_DNase_beta_globin | qPCR_DNase_denat_restr_beta_actin    | 0,00000 |

|                                |                                      |         |
|--------------------------------|--------------------------------------|---------|
| ddPCR_DNase_beta_globin        | qPCR_DNase_denat_restr_beta_globin   | 0,00000 |
| ddPCR_DNase_beta_globin        | qPCR_DNase_denat_restr_CMV_enhancer  | 0,00000 |
| ddPCR_DNase_beta_globin        | qPCR_DNase_denat_restr_polyA         | 0,00000 |
| ddPCR_DNase_beta_globin        | qPCR_DNase_polyA                     | 0,99996 |
| ddPCR_DNase_CMV_enhancer       | ddPCR_DNase_denat_beta_actin         | 0,00000 |
| ddPCR_DNase_CMV_enhancer       | ddPCR_DNase_denat_beta_globin        | 0,00000 |
| ddPCR_DNase_CMV_enhancer       | ddPCR_DNase_denat_CMV_enhancer       | 0,99882 |
| ddPCR_DNase_CMV_enhancer       | ddPCR_DNase_denat_polyA              | 0,00000 |
| ddPCR_DNase_CMV_enhancer       | ddPCR_DNase_denat_restr_beta_actin   | 0,00000 |
| ddPCR_DNase_CMV_enhancer       | ddPCR_DNase_denat_restr_beta_globin  | 0,00000 |
| ddPCR_DNase_CMV_enhancer       | ddPCR_DNase_denat_restr_CMV_enhancer | 0,00000 |
| ddPCR_DNase_CMV_enhancer       | ddPCR_DNase_denat_restr_polyA        | 0,00000 |
| ddPCR_DNase_CMV_enhancer       | ddPCR_DNase_polyA                    | 1,00000 |
| ddPCR_DNase_CMV_enhancer       | qPCR_DNase_beta_actin                | 0,21643 |
| ddPCR_DNase_CMV_enhancer       | qPCR_DNase_beta_globin               | 1,00000 |
| ddPCR_DNase_CMV_enhancer       | qPCR_DNase_CMV_enhancer              | 1,00000 |
| ddPCR_DNase_CMV_enhancer       | qPCR_DNase_denat_beta_actin          | 0,00000 |
| ddPCR_DNase_CMV_enhancer       | qPCR_DNase_denat_beta_globin         | 0,00000 |
| ddPCR_DNase_CMV_enhancer       | qPCR_DNase_denat_CMV_enhancer        | 0,00000 |
| ddPCR_DNase_CMV_enhancer       | qPCR_DNase_denat_polyA               | 0,00000 |
| ddPCR_DNase_CMV_enhancer       | qPCR_DNase_denat_restr_beta_actin    | 0,00000 |
| ddPCR_DNase_CMV_enhancer       | qPCR_DNase_denat_restr_beta_globin   | 0,00000 |
| ddPCR_DNase_CMV_enhancer       | qPCR_DNase_denat_restr_CMV_enhancer  | 0,00000 |
| ddPCR_DNase_CMV_enhancer       | qPCR_DNase_denat_restr_polyA         | 0,00000 |
| ddPCR_DNase_CMV_enhancer       | qPCR_DNase_polyA                     | 1,00000 |
| ddPCR_DNase_denat_beta_actin   | ddPCR_DNase_denat_beta_globin        | 1,00000 |
| ddPCR_DNase_denat_beta_actin   | ddPCR_DNase_denat_CMV_enhancer       | 0,00000 |
| ddPCR_DNase_denat_beta_actin   | ddPCR_DNase_denat_polyA              | 0,95702 |
| ddPCR_DNase_denat_beta_actin   | ddPCR_DNase_denat_restr_beta_actin   | 0,00000 |
| ddPCR_DNase_denat_beta_actin   | ddPCR_DNase_denat_restr_beta_globin  | 0,00000 |
| ddPCR_DNase_denat_beta_actin   | ddPCR_DNase_denat_restr_CMV_enhancer | 1,00000 |
| ddPCR_DNase_denat_beta_actin   | ddPCR_DNase_denat_restr_polyA        | 0,00000 |
| ddPCR_DNase_denat_beta_actin   | ddPCR_DNase_polyA                    | 0,00000 |
| ddPCR_DNase_denat_beta_actin   | qPCR_DNase_beta_actin                | 0,00009 |
| ddPCR_DNase_denat_beta_actin   | qPCR_DNase_beta_globin               | 0,00000 |
| ddPCR_DNase_denat_beta_actin   | qPCR_DNase_CMV_enhancer              | 0,00000 |
| ddPCR_DNase_denat_beta_actin   | qPCR_DNase_denat_beta_actin          | 0,00000 |
| ddPCR_DNase_denat_beta_actin   | qPCR_DNase_denat_beta_globin         | 0,00000 |
| ddPCR_DNase_denat_beta_actin   | qPCR_DNase_denat_CMV_enhancer        | 1,00000 |
| ddPCR_DNase_denat_beta_actin   | qPCR_DNase_denat_polyA               | 0,00000 |
| ddPCR_DNase_denat_beta_actin   | qPCR_DNase_denat_restr_beta_actin    | 0,00000 |
| ddPCR_DNase_denat_beta_actin   | qPCR_DNase_denat_restr_beta_globin   | 0,00000 |
| ddPCR_DNase_denat_beta_actin   | qPCR_DNase_denat_restr_CMV_enhancer  | 0,00000 |
| ddPCR_DNase_denat_beta_actin   | qPCR_DNase_denat_restr_polyA         | 0,00000 |
| ddPCR_DNase_denat_beta_actin   | qPCR_DNase_polyA                     | 0,00000 |
| ddPCR_DNase_denat_beta_globin  | ddPCR_DNase_denat_CMV_enhancer       | 0,00000 |
| ddPCR_DNase_denat_beta_globin  | ddPCR_DNase_denat_polyA              | 0,99507 |
| ddPCR_DNase_denat_beta_globin  | ddPCR_DNase_denat_restr_beta_actin   | 0,00000 |
| ddPCR_DNase_denat_beta_globin  | ddPCR_DNase_denat_restr_beta_globin  | 0,00000 |
| ddPCR_DNase_denat_beta_globin  | ddPCR_DNase_denat_restr_CMV_enhancer | 0,99961 |
| ddPCR_DNase_denat_beta_globin  | ddPCR_DNase_denat_restr_polyA        | 0,00000 |
| ddPCR_DNase_denat_beta_globin  | ddPCR_DNase_polyA                    | 0,00000 |
| ddPCR_DNase_denat_beta_globin  | qPCR_DNase_beta_actin                | 0,00002 |
| ddPCR_DNase_denat_beta_globin  | qPCR_DNase_beta_globin               | 0,00000 |
| ddPCR_DNase_denat_beta_globin  | qPCR_DNase_CMV_enhancer              | 0,00000 |
| ddPCR_DNase_denat_beta_globin  | qPCR_DNase_denat_beta_actin          | 0,00000 |
| ddPCR_DNase_denat_beta_globin  | qPCR_DNase_denat_beta_globin         | 0,00000 |
| ddPCR_DNase_denat_beta_globin  | qPCR_DNase_denat_CMV_enhancer        | 1,00000 |
| ddPCR_DNase_denat_beta_globin  | qPCR_DNase_denat_polyA               | 0,00000 |
| ddPCR_DNase_denat_beta_globin  | qPCR_DNase_denat_restr_beta_actin    | 0,00000 |
| ddPCR_DNase_denat_beta_globin  | qPCR_DNase_denat_restr_beta_globin   | 0,00000 |
| ddPCR_DNase_denat_beta_globin  | qPCR_DNase_denat_restr_CMV_enhancer  | 0,00000 |
| ddPCR_DNase_denat_beta_globin  | qPCR_DNase_denat_restr_polyA         | 0,00000 |
| ddPCR_DNase_denat_beta_globin  | qPCR_DNase_polyA                     | 0,00000 |
| ddPCR_DNase_denat_CMV_enhancer | ddPCR_DNase_denat_polyA              | 0,00000 |





|                                      |                                     |         |
|--------------------------------------|-------------------------------------|---------|
| ddPCR_DNase_denat_restr_CMV_enhancer | ddPCR_DNase_denat_restr_polyA       | 0,00000 |
| ddPCR_DNase_denat_restr_CMV_enhancer | ddPCR_DNase_polyA                   | 0,00000 |
| ddPCR_DNase_denat_restr_CMV_enhancer | qPCR_DNase_beta_actin               | 0,00251 |
| ddPCR_DNase_denat_restr_CMV_enhancer | qPCR_DNase_beta_globin              | 0,00000 |
| ddPCR_DNase_denat_restr_CMV_enhancer | qPCR_DNase_CMV_enhancer             | 0,00000 |
| ddPCR_DNase_denat_restr_CMV_enhancer | qPCR_DNase_denat_beta_actin         | 0,00000 |
| ddPCR_DNase_denat_restr_CMV_enhancer | qPCR_DNase_denat_beta_globin        | 0,00000 |
| ddPCR_DNase_denat_restr_CMV_enhancer | qPCR_DNase_denat_CMV_enhancer       | 0,97393 |
| ddPCR_DNase_denat_restr_CMV_enhancer | qPCR_DNase_denat_polyA              | 0,00000 |
| ddPCR_DNase_denat_restr_CMV_enhancer | qPCR_DNase_denat_restr_beta_actin   | 0,00000 |
| ddPCR_DNase_denat_restr_CMV_enhancer | qPCR_DNase_denat_restr_beta_globin  | 0,00000 |
| ddPCR_DNase_denat_restr_CMV_enhancer | qPCR_DNase_denat_restr_CMV_enhancer | 0,00000 |
| ddPCR_DNase_denat_restr_CMV_enhancer | qPCR_DNase_denat_restr_polyA        | 0,00000 |
| ddPCR_DNase_denat_restr_polyA        | qPCR_DNase_polyA                    | 0,00000 |
| ddPCR_DNase_denat_restr_polyA        | ddPCR_DNase_polyA                   | 0,00000 |
| ddPCR_DNase_denat_restr_polyA        | qPCR_DNase_beta_actin               | 0,00000 |
| ddPCR_DNase_denat_restr_polyA        | qPCR_DNase_beta_globin              | 0,00000 |
| ddPCR_DNase_denat_restr_polyA        | qPCR_DNase_CMV_enhancer             | 0,00000 |
| ddPCR_DNase_denat_restr_polyA        | qPCR_DNase_denat_beta_actin         | 0,00000 |
| ddPCR_DNase_denat_restr_polyA        | qPCR_DNase_denat_beta_globin        | 0,00000 |
| ddPCR_DNase_denat_restr_polyA        | qPCR_DNase_denat_CMV_enhancer       | 0,00000 |
| ddPCR_DNase_denat_restr_polyA        | qPCR_DNase_denat_polyA              | 0,99873 |
| ddPCR_DNase_denat_restr_polyA        | qPCR_DNase_denat_restr_beta_actin   | 0,00872 |
| ddPCR_DNase_denat_restr_polyA        | qPCR_DNase_denat_restr_beta_globin  | 0,00491 |
| ddPCR_DNase_denat_restr_polyA        | qPCR_DNase_denat_restr_CMV_enhancer | 0,00000 |
| ddPCR_DNase_denat_restr_polyA        | qPCR_DNase_denat_restr_polyA        | 0,00000 |
| ddPCR_DNase_denat_restr_polyA        | qPCR_DNase_polyA                    | 0,00000 |
| ddPCR_DNase_polyA                    | qPCR_DNase_beta_actin               | 0,11522 |
| ddPCR_DNase_polyA                    | qPCR_DNase_beta_globin              | 1,00000 |
| ddPCR_DNase_polyA                    | qPCR_DNase_CMV_enhancer             | 1,00000 |
| ddPCR_DNase_polyA                    | qPCR_DNase_denat_beta_actin         | 0,00000 |
| ddPCR_DNase_polyA                    | qPCR_DNase_denat_beta_globin        | 0,00000 |
| ddPCR_DNase_polyA                    | qPCR_DNase_denat_CMV_enhancer       | 0,00000 |
| ddPCR_DNase_polyA                    | qPCR_DNase_denat_polyA              | 0,00000 |
| ddPCR_DNase_polyA                    | qPCR_DNase_denat_restr_beta_actin   | 0,00000 |
| ddPCR_DNase_polyA                    | qPCR_DNase_denat_restr_beta_globin  | 0,00000 |
| ddPCR_DNase_polyA                    | qPCR_DNase_denat_restr_CMV_enhancer | 0,00000 |
| ddPCR_DNase_polyA                    | qPCR_DNase_denat_restr_polyA        | 0,00000 |
| ddPCR_DNase_polyA                    | qPCR_DNase_polyA                    | 1,00000 |
| qPCR_DNase_beta_actin                | qPCR_DNase_beta_globin              | 0,77216 |
| qPCR_DNase_beta_actin                | qPCR_DNase_CMV_enhancer             | 0,77216 |
| qPCR_DNase_beta_actin                | qPCR_DNase_denat_beta_actin         | 0,00000 |
| qPCR_DNase_beta_actin                | qPCR_DNase_denat_beta_globin        | 0,00000 |
| qPCR_DNase_beta_actin                | qPCR_DNase_denat_CMV_enhancer       | 0,00000 |
| qPCR_DNase_beta_actin                | qPCR_DNase_denat_polyA              | 0,00000 |
| qPCR_DNase_beta_actin                | qPCR_DNase_denat_restr_beta_actin   | 0,00000 |
| qPCR_DNase_beta_actin                | qPCR_DNase_denat_restr_beta_globin  | 0,00000 |
| qPCR_DNase_beta_actin                | qPCR_DNase_denat_restr_CMV_enhancer | 0,00000 |
| qPCR_DNase_beta_actin                | qPCR_DNase_denat_restr_polyA        | 0,00000 |
| qPCR_DNase_beta_actin                | qPCR_DNase_polyA                    | 0,77216 |
| qPCR_DNase_beta_globin               | qPCR_DNase_CMV_enhancer             | 1,00000 |
| qPCR_DNase_beta_globin               | qPCR_DNase_denat_beta_actin         | 0,00000 |
| qPCR_DNase_beta_globin               | qPCR_DNase_denat_beta_globin        | 0,00000 |
| qPCR_DNase_beta_globin               | qPCR_DNase_denat_CMV_enhancer       | 0,00000 |
| qPCR_DNase_beta_globin               | qPCR_DNase_denat_polyA              | 0,00000 |
| qPCR_DNase_beta_globin               | qPCR_DNase_denat_restr_beta_actin   | 0,00000 |
| qPCR_DNase_beta_globin               | qPCR_DNase_denat_restr_beta_globin  | 0,00000 |
| qPCR_DNase_beta_globin               | qPCR_DNase_denat_restr_CMV_enhancer | 0,00000 |
| qPCR_DNase_beta_globin               | qPCR_DNase_denat_restr_polyA        | 0,00000 |
| qPCR_DNase_beta_globin               | qPCR_DNase_polyA                    | 1,00000 |
| qPCR_DNase_CMV_enhancer              | qPCR_DNase_denat_beta_actin         | 0,00000 |
| qPCR_DNase_CMV_enhancer              | qPCR_DNase_denat_beta_globin        | 0,00000 |
| qPCR_DNase_CMV_enhancer              | qPCR_DNase_denat_CMV_enhancer       | 0,00000 |
| qPCR_DNase_CMV_enhancer              | qPCR_DNase_denat_polyA              | 0,00000 |
| qPCR_DNase_CMV_enhancer              | qPCR_DNase_denat_restr_beta_actin   | 0,00000 |

|                                     |                                     |         |
|-------------------------------------|-------------------------------------|---------|
| qPCR_DNase_CMV_enhancer             | qPCR_DNase_denat_restr_beta_globin  | 0,00000 |
| qPCR_DNase_CMV_enhancer             | qPCR_DNase_denat_restr_CMV_enhancer | 0,00000 |
| qPCR_DNase_CMV_enhancer             | qPCR_DNase_denat_restr_polyA        | 0,00000 |
| qPCR_DNase_CMV_enhancer             | qPCR_DNase_polyA                    | 1,00000 |
| qPCR_DNase_denat_beta_actin         | qPCR_DNase_denat_beta_globin        | 1,00000 |
| qPCR_DNase_denat_beta_actin         | qPCR_DNase_denat_CMV_enhancer       | 0,00000 |
| qPCR_DNase_denat_beta_actin         | qPCR_DNase_denat_polyA              | 0,00000 |
| qPCR_DNase_denat_beta_actin         | qPCR_DNase_denat_restr_beta_actin   | 0,00000 |
| qPCR_DNase_denat_beta_actin         | qPCR_DNase_denat_restr_beta_globin  | 0,00000 |
| qPCR_DNase_denat_beta_actin         | qPCR_DNase_denat_restr_CMV_enhancer | 0,88860 |
| qPCR_DNase_denat_beta_actin         | qPCR_DNase_denat_restr_polyA        | 0,00000 |
| qPCR_DNase_denat_beta_actin         | qPCR_DNase_polyA                    | 0,00000 |
| qPCR_DNase_denat_beta_globin        | qPCR_DNase_denat_CMV_enhancer       | 0,00000 |
| qPCR_DNase_denat_beta_globin        | qPCR_DNase_denat_polyA              | 0,00000 |
| qPCR_DNase_denat_beta_globin        | qPCR_DNase_denat_restr_beta_actin   | 0,00000 |
| qPCR_DNase_denat_beta_globin        | qPCR_DNase_denat_restr_beta_globin  | 0,00000 |
| qPCR_DNase_denat_beta_globin        | qPCR_DNase_denat_restr_CMV_enhancer | 0,96181 |
| qPCR_DNase_denat_beta_globin        | qPCR_DNase_denat_restr_polyA        | 0,00000 |
| qPCR_DNase_denat_beta_globin        | qPCR_DNase_polyA                    | 0,00000 |
| qPCR_DNase_denat_CMV_enhancer       | qPCR_DNase_denat_polyA              | 0,00000 |
| qPCR_DNase_denat_CMV_enhancer       | qPCR_DNase_denat_restr_beta_actin   | 0,00000 |
| qPCR_DNase_denat_CMV_enhancer       | qPCR_DNase_denat_restr_beta_globin  | 0,00000 |
| qPCR_DNase_denat_CMV_enhancer       | qPCR_DNase_denat_restr_CMV_enhancer | 0,00000 |
| qPCR_DNase_denat_CMV_enhancer       | qPCR_DNase_denat_restr_polyA        | 0,00000 |
| qPCR_DNase_denat_CMV_enhancer       | qPCR_DNase_polyA                    | 0,00000 |
| qPCR_DNase_denat_polyA              | qPCR_DNase_denat_restr_beta_actin   | 0,00000 |
| qPCR_DNase_denat_polyA              | qPCR_DNase_denat_restr_beta_globin  | 0,00000 |
| qPCR_DNase_denat_polyA              | qPCR_DNase_denat_restr_CMV_enhancer | 0,00000 |
| qPCR_DNase_denat_polyA              | qPCR_DNase_denat_restr_polyA        | 0,00000 |
| qPCR_DNase_denat_polyA              | qPCR_DNase_polyA                    | 0,00000 |
| qPCR_DNase_denat_restr_beta_actin   | qPCR_DNase_denat_restr_beta_globin  | 1,00000 |
| qPCR_DNase_denat_restr_beta_actin   | qPCR_DNase_denat_restr_CMV_enhancer | 0,00000 |
| qPCR_DNase_denat_restr_beta_actin   | qPCR_DNase_denat_restr_polyA        | 0,00000 |
| qPCR_DNase_denat_restr_beta_actin   | qPCR_DNase_polyA                    | 0,00000 |
| qPCR_DNase_denat_restr_beta_globin  | qPCR_DNase_denat_restr_CMV_enhancer | 0,00000 |
| qPCR_DNase_denat_restr_beta_globin  | qPCR_DNase_denat_restr_polyA        | 0,00000 |
| qPCR_DNase_denat_restr_beta_globin  | qPCR_DNase_polyA                    | 0,00000 |
| qPCR_DNase_denat_restr_CMV_enhancer | qPCR_DNase_denat_restr_polyA        | 0,00000 |
| qPCR_DNase_denat_restr_CMV_enhancer | qPCR_DNase_polyA                    | 0,00000 |
| qPCR_DNase_denat_restr_polyA        | qPCR_DNase_polyA                    | 0,00000 |
