# Supplementary material for: Accurate Quantification and Characterization of Adeno-Associated Viral Vectors
Source: PubMed Central journal article supplement (PMC6650692; doi:10.3389/fmicb.2019.01570), 2019-07-17
Supplement: Data_Sheet_2.pdf [file Data_Sheet_2.pdf]

*Supplementary Material – Data Sheet 2*

**Accurate quantification and characterization of adeno-associated viral vectors**

David Dobnik\*, Polona Kogovšek, Tjaša Jakomin, Nejc Košir, Magda Tušek Žnidarič, Maja Leskovec, Stephen M. Kaminsky, Janet Mostrom, Hyunmi Lee, Maja Ravnikar

\* Correspondence: David Dobnik: [david.dobnik@nib.si](mailto:david.dobnik@nib.si)

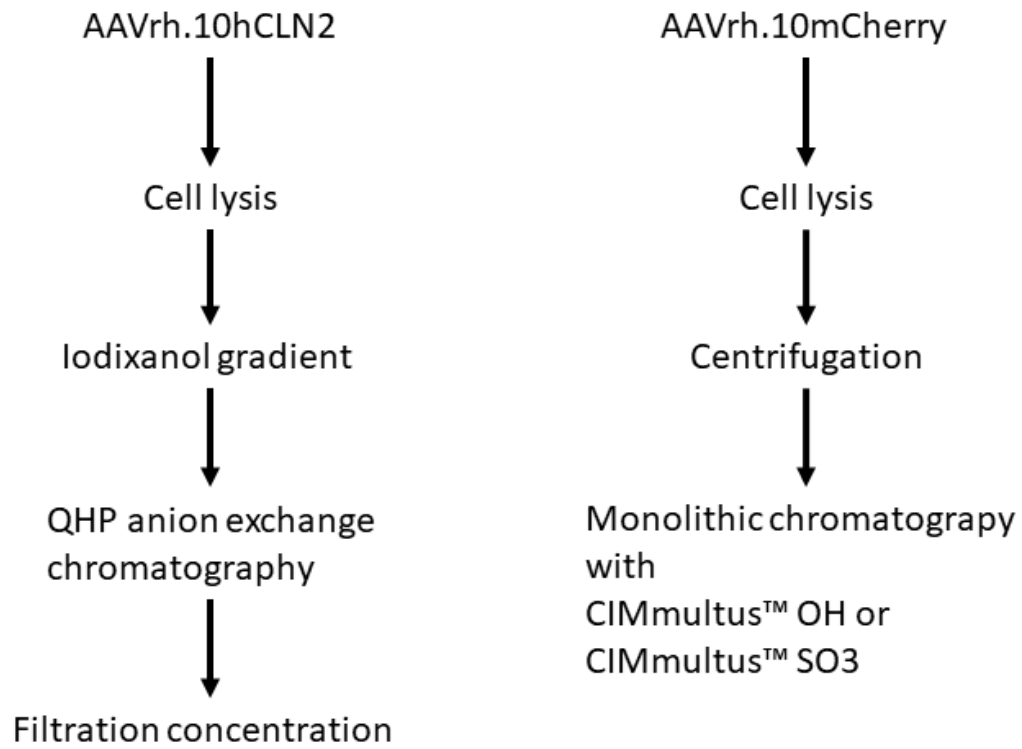

**Supplementary Figure 1.** Schematic representation of purification steps for AAVrh.10hCLN2 and AAVrh.10mCherry viral vectors

$dG = -322.78$  at  $60\text{ }^{\circ}\text{C}$

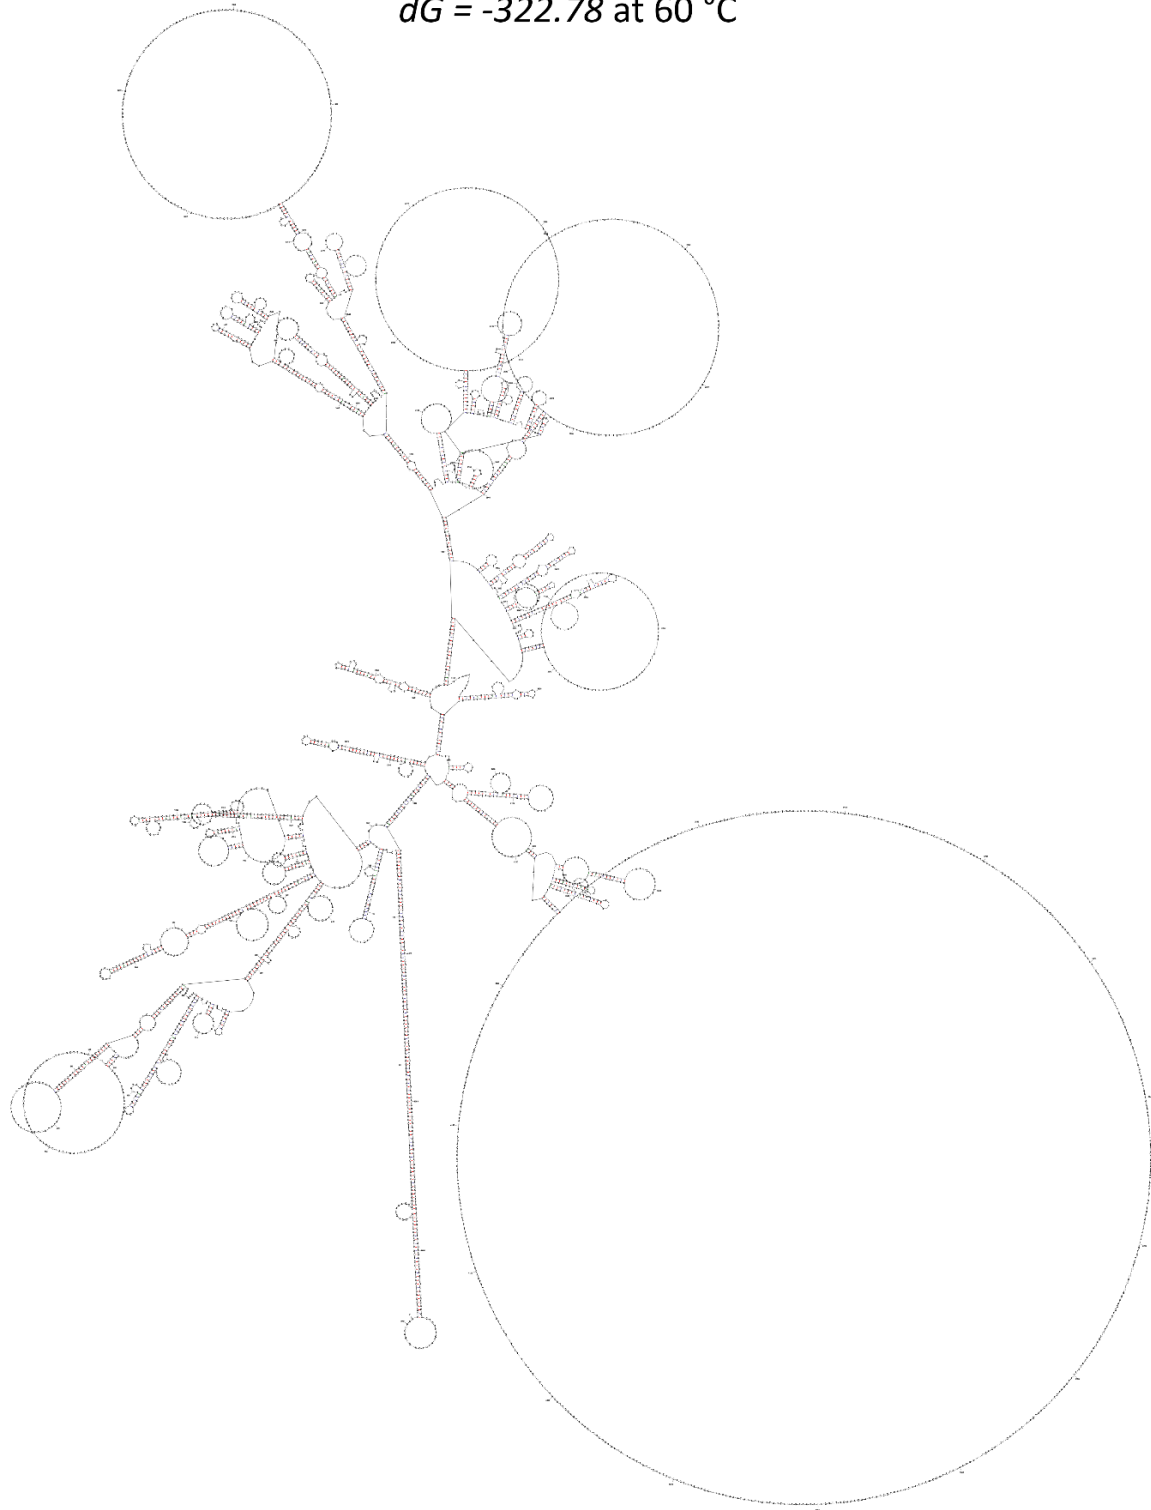

**Supplementary Figure 2.** Predicted secondary structure of vector construct at 60 °C.

$dG = -230.93$  at  $60^{\circ}\text{C}$

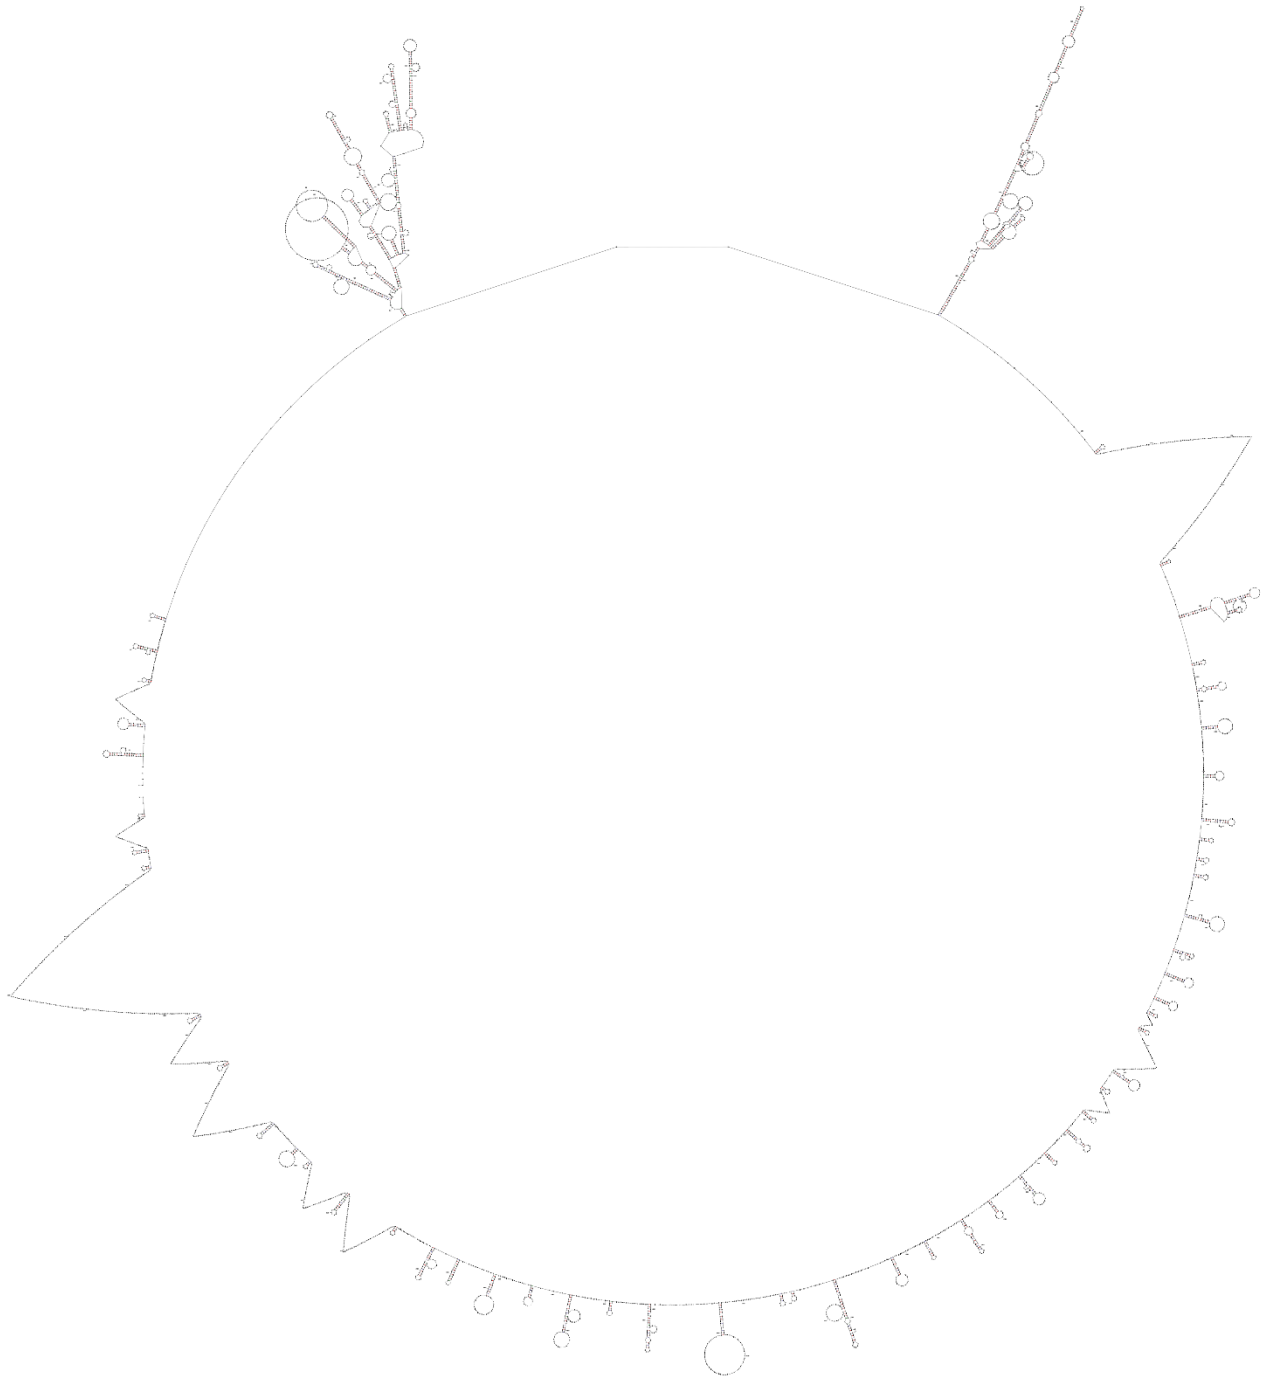

**Supplementary Figure 3.** Predicted secondary structure of vector construct without ITR regions at  $60^{\circ}\text{C}$ .

$dG = -15.76$  at  $99\text{ }^{\circ}\text{C}$

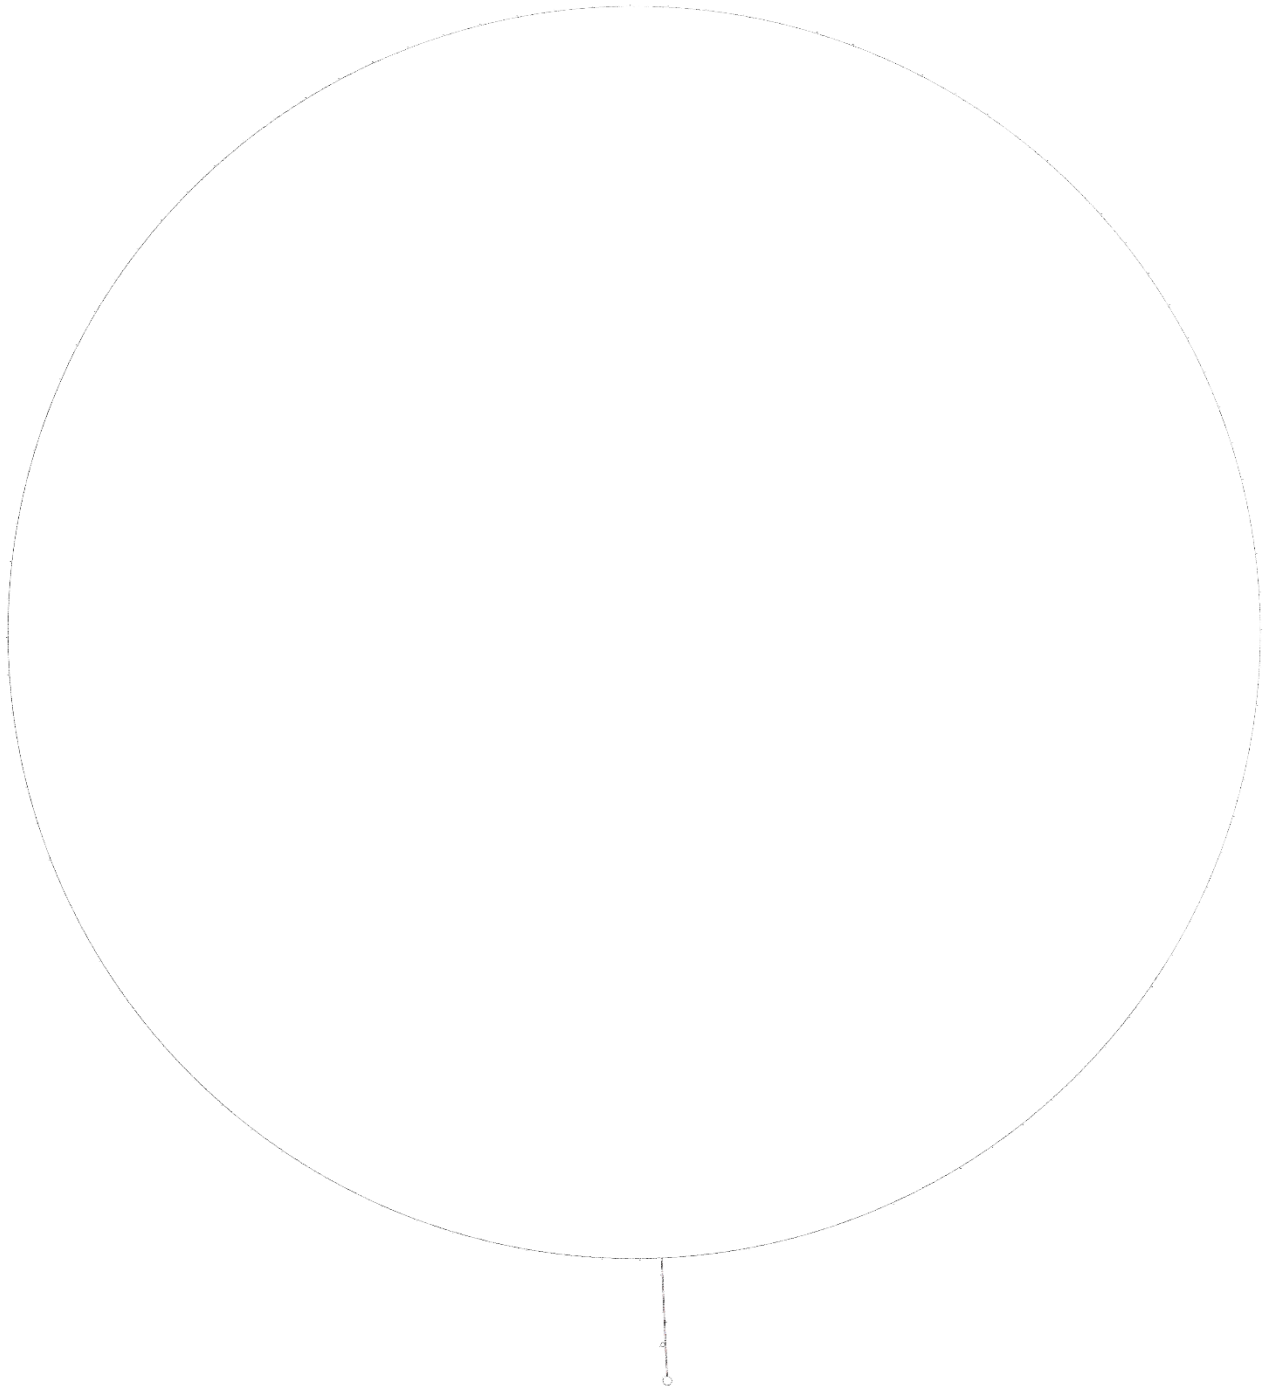

**Supplementary Figure 4.** Predicted secondary structure of vector construct at  $99\text{ }^{\circ}\text{C}$ .
